# Supplementary material for: A Time-Division Multiplexing Multi-Channel Micro-Electrochemical Workstation with Carbon-Based Material Electrodes for Online L-Trosine Detection
Source: MDPI journal article supplement (doi:10.3390/s23146252), 2023-07-09
Supplement: s1 [file s1]

## Supporting information

**A time-division multiplexing multi-channel micro-electrochemical workstation with carbon-based material electrodes for online L-tyrosine detection**

Qiwen Bao<sup>1</sup>, Gang Li<sup>1</sup>, Zhengchun Yang<sup>2</sup>, Jun Wei<sup>3</sup>, Wenbo Cheng<sup>4</sup>, Zilian Qu<sup>5</sup>,  
and Ling Lin<sup>1\*</sup>

<sup>1</sup>School of Precision Instrument and Optoelectronic Engineering, the State Key Laboratory of Precision Measuring Technology and Instruments, 92 Weijin Road, Tianjin University, Tianjin 300072, China

<sup>2</sup>School of Electrical and Electronic Engineering, Tianjin Key Laboratory of Film Electronic & Communication Devices, Advanced Materials and Printed Electronics Center, Tianjin University of Technology, Tianjin 300384, China

<sup>3</sup>School of Materials Science and Engineering, Harbin Institute of Technology, Shenzhen 518055, China

<sup>4</sup>Suzhou Institute of Biomedical Engineering and Technology, Chinese Academy of Sciences, Suzhou 215163, China

<sup>5</sup>Beijing Informat Technol Coll, Beijing 100015, China

\*Corresponding author; email: linling@tju.edu.c

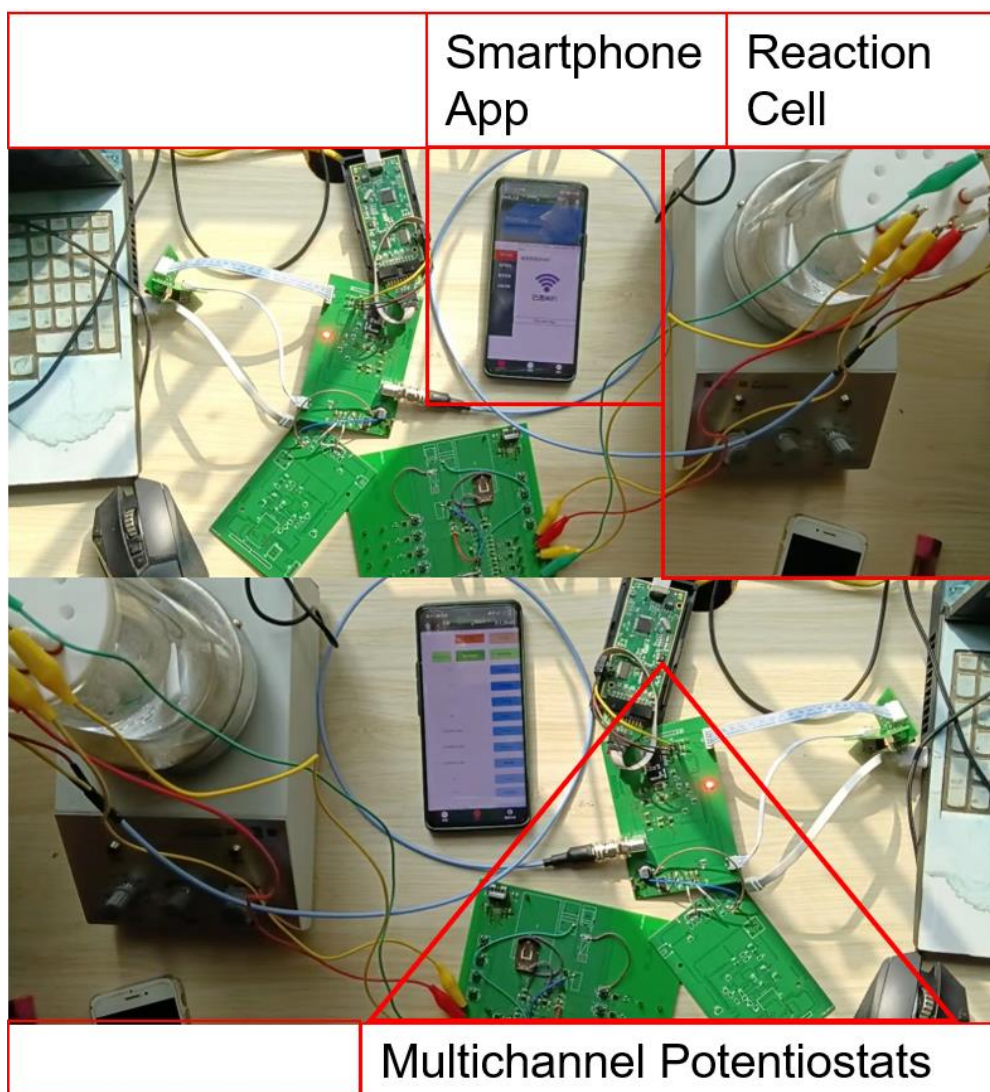

**Figure S1** Working diagram of multi-channel electrochemical sensor test platform.

**Table S1**

Comparison of the analytical parameters obtained for the Bi NPs@GO-MWCNT modified nanocomposite electrode with previously reported modified electrodes.

| Electrode                                                                   | LOD (nM) | Sensitivity                        | Liner Range ( $\mu\text{M}$ ) | Ref |
|-----------------------------------------------------------------------------|----------|------------------------------------|-------------------------------|-----|
| Macroporous carbon embedded with sulfato-beta-cyclodextrin (MPC-SCD) hybrid | 260      | $73.02 \mu\text{A}/\text{mM cm}^2$ | 1–500                         | [1] |
| Screen Printed Carbon Electrode (SPCE) with                                 | 0.05     | –                                  | 0.1–60                        | [2] |

|                                                                                                                                    |                    |   |         |           |
|------------------------------------------------------------------------------------------------------------------------------------|--------------------|---|---------|-----------|
| Graphene Oxide-COOH/Chitosan (GO-COOH/Chitosan) electro-deposition                                                                 |                    |   |         |           |
| Graphene Oxide-epsilon-MnO <sub>2</sub> Microspheres/Chitosan Modified Activated Glassy Carbon Electrode                           | 8.3                | – | 0.02–20 | [3]       |
| Cysteric acid - modified glassy carbon electrode                                                                                   | 1100               | – | 3.5-96  | [4]       |
| Poly L-methionine/Electrochemically Reduced Graphene Oxide Composite Film Modified Glassy Carbon Electrode (poly(L-Met)/ERGO/GCE)) | 0.27               |   | 1–70    | [5]       |
| Crown Ether/Ionic Liquid Crystal-Carbon Nanotubes                                                                                  | 1.42               | – | 0.01-60 | [6]       |
| Poly (Diphenylamine) Modified Electrode                                                                                            | 20000              |   | 20–1000 | [7]       |
| Carbon-graphene oxide/screen-printed carbon electrodes (CB-GO/SPCE)                                                                | 20×10 <sup>3</sup> |   | 20-200  | This work |

## References

1. Zhao, J.; Cong, L.R.; Ding, Z.Y.; Zhu, X.J.; Zhang, Y.F.; Li, S.H.; Liu, J.; Chen, X.; Hou, H.B.; Fan, Z.; et al. Enantioselective electrochemical sensor of tyrosine isomers based on macroporous carbon embedded with sulfato-beta-Cyclodextrin. *Microchemical Journal* **2020**, *159*, doi:10.1016/j.microc.2020.105469.
2. Fooladi, E.; Razavizadeh, B.M.; Noori, M.; Kakooei, S. Application of carboxylic acid-functionalized of graphene oxide for electrochemical simultaneous determination of tryptophan and tyrosine in milk. *Sn Applied Sciences* **2020**, *2*, doi:10.1007/s42452-020-2332-0.
3. Wang, S.Q.; Zhai, H.Y.; Chen, Z.G.; Wang, H.H.; Tan, X.C.; Sun, G.H.; Zhou, Q. Constructing a Sensitive Electrochemical Sensor for Tyrosine Based on Graphene Oxide-epsilon-MnO<sub>2</sub>

Microspheres/Chitosan Modified Activated Glassy Carbon Electrode. *Journal of the Electrochemical Society* **2017**, 164, B758-B766, doi:10.1149/2.0571714jes.

4. Hassanvand, Z.; Jalali, F. Simultaneous determination of L-DOPA, L-tyrosine and uric acid by cysteine acid - modified glassy carbon electrode. *Materials Science and Engineering C-Materials for Biological Applications* **2019**, 98, 496-502, doi:10.1016/j.msec.2018.12.131.
5. Swathy, S.; Mathew, M.R.; Kumar, K.G. Poly L- methionine/Electrochemically Reduced Graphene Oxide Composite Film Modified Glassy Carbon Electrode for the Simultaneous Determination of 5-hydroxyindole Acetic Acid and Tyrosine. *Journal of the Electrochemical Society* **2022**, 169, doi:10.1149/1945-7111/ac8ad3.
6. Atta, N.F.; Galal, A.; Ahmed, Y.M. Highly Conductive Crown Ether/Ionic Liquid Crystal-Carbon Nanotubes Composite Based Electrochemical Sensor for Chiral Recognition of Tyrosine Enantiomers. *Journal of the Electrochemical Society* **2019**, 166, B623-B630, doi:10.1149/2.0771908jes.
7. Krishnan, R.G.; Saraswathyamma, B. Simultaneous Resolution and Electrochemical Quantification of Tyrosine and Tryptophan at a Poly (Diphenylamine) Modified Electrode. *Journal of the Electrochemical Society* **2021**, 168, doi:10.1149/1945-7111/abe1dd.
